# Supplementary material for: Dissecting the Prognostic Significance and Functional Role of Progranulin in Chronic Lymphocytic Leukemia
Source: PubMed Central journal article supplement (PMC6627891; doi:10.3390/cancers11060822), 2019-06-13
Supplement: cancers-11-00822-s001.pdf [file cancers-11-00822-s001.pdf]

# Dissecting the Prognostic Significance and Functional Role of Progranulin in Chronic Lymphocytic Leukemia

Lena Schulze-Edinghausen, Claudia Dürr, Selcen Öztürk, Manuela Zucknick, Axel Benner, Verena Kalter, Sibylle Ohl, Viola Close, Patrick Wuchter, Stephan Stilgenbauer, Peter Lichter and Martina Seiffert

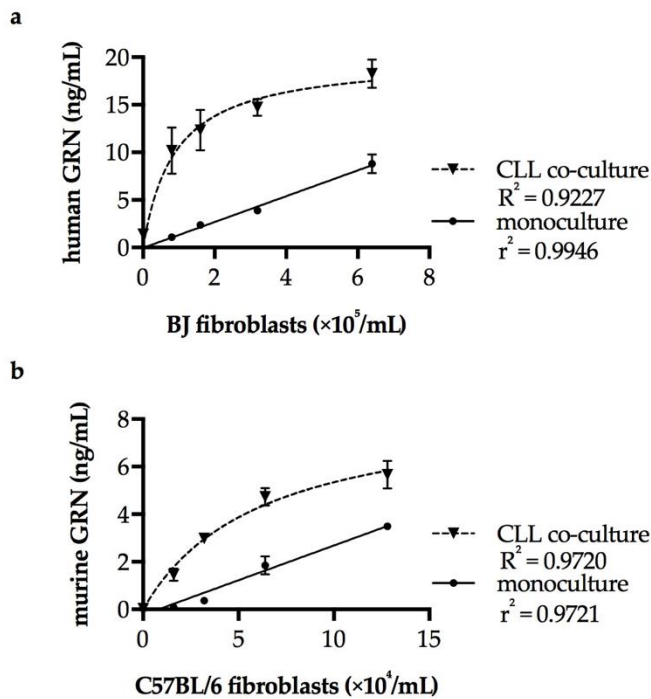

**Figure S1.** GRN secretion by stromal cells of mesenchymal origin is induced in CLL co-cultures. Increasing numbers of stromal cells were either cultured alone (solid lines) or co-cultured with  $2 \times 10^6$ /mL primary human CLL cells (dashed lines) for 5 days. GRN was quantified in cell culture supernatants by ELISA. Means and SD of technical triplicates are plotted. Calculations of linear regression ( $r^2$ ) and nonlinear regression for a hyperbolic curve ( $R^2$ ) are depicted. (a) Cultures of human BJ fibroblasts. Representative for  $n = 3$  biological replicates of the co-culture. (b) Xenogeneic cultures of murine C57BL/6 fibroblasts with and without human CLL cells. GRN was quantified with a murine-specific ELISA kit, the lack of cross-reactivity to human GRN was experimentally validated (not shown). Representative for  $n = 4$  biological replicates of the co-culture.

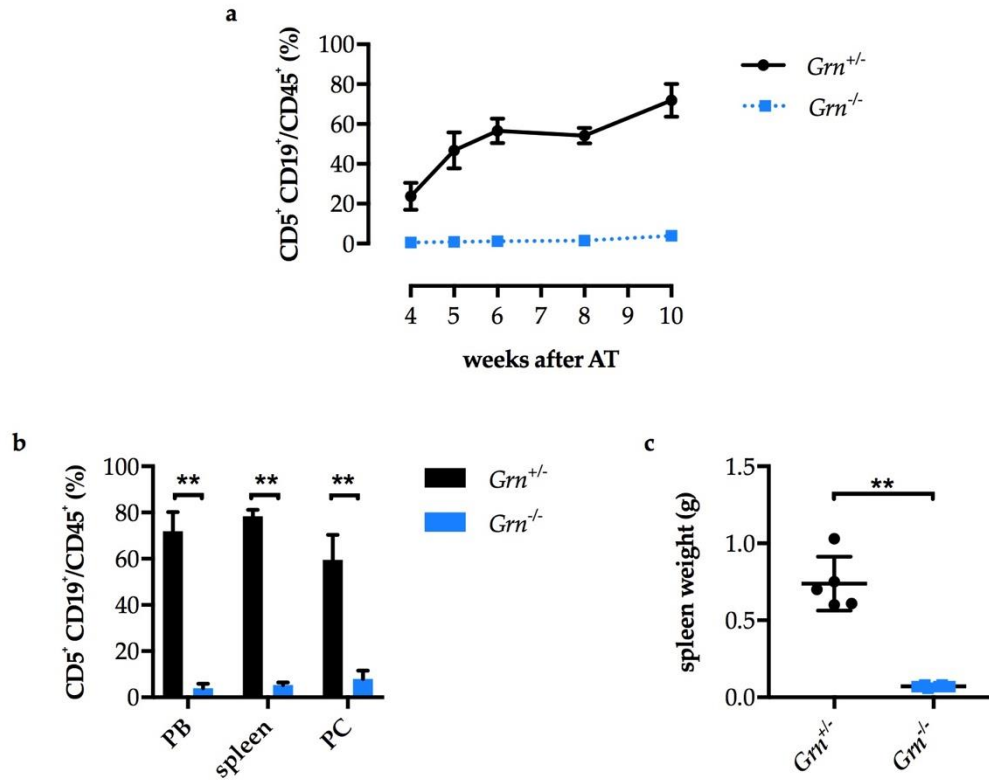

**Figure S2.** *Grn*<sup>-/-</sup> mice do not develop leukemia after E $\mu$ -*TCL1* adoptive transfer.  $2 \times 10^7$  E $\mu$ -*TCL1* tumor cells were adoptively transferred (AT) to *Grn*<sup>-/-</sup> mice (blue) and heterozygous littermates (black) by i.p. injection, all mice were 7–8 week old males, n=5-6 per group. Plots show means and SD. (a) Leukemic cell load (CD5<sup>+</sup> CD19<sup>+</sup> cells out CD45<sup>+</sup> cells) in the peripheral blood (PB) was analyzed by flow cytometry at different time points after AT. Mann-Whitney U tests comparing both experimental groups at each time point:  $p = 0.0022$  (at 4, 5 and 6 weeks),  $p = 0.0043$  (at 8 and 10 weeks). (b) Leukemic cell load was analyzed in the PB, in splenic and peritoneal cavity (PC) single cell suspensions at the study endpoint 10 weeks after AT. Mann-Whitney U tests, all  $p = 0.0043$ . (c) Spleen weight was assessed at the study endpoint. Mann-Whitney U test,  $p = 0.0022$ .

**Table S1.** Characteristics of 249 CLL patients from the CLL8 study cohort by the German CLL Study Group.

| Patient Characteristics |                | n   | %    |
|-------------------------|----------------|-----|------|
| IGHV status             | mutated        | 89  | 35.7 |
|                         | unmutated      | 149 | 59.8 |
|                         | n.a.           | 11  | 4.4  |
| <i>TP53</i> mutation    | no             | 209 | 83.9 |
|                         | yes            | 29  | 11.7 |
|                         | n.a.           | 11  | 4.4  |
| <i>NOTCH1</i> mutation  | no             | 150 | 60.2 |
|                         | yes            | 9   | 3.6  |
|                         | n.a.           | 90  | 36.1 |
| <i>SF3B1</i> mutation   | no             | 131 | 52.6 |
|                         | yes            | 28  | 11.2 |
|                         | n.a.           | 90  | 36.1 |
| 11q del                 | no             | 170 | 68.3 |
|                         | yes            | 64  | 25.7 |
|                         | n.a.           | 15  | 6.0  |
| 17p del                 | no             | 217 | 87.2 |
|                         | yes            | 17  | 6.8  |
|                         | n.a.           | 15  | 6.0  |
| 13q del                 | no             | 109 | 43.8 |
|                         | yes            | 124 | 49.8 |
|                         | n.a.           | 16  | 6.4  |
| 6q del                  | no             | 42  | 16.9 |
|                         | yes            | 0   | 0    |
|                         | n.a.           | 207 | 83.1 |
| trisomy 12              | no             | 203 | 81.5 |
|                         | yes            | 30  | 12.1 |
|                         | n.a.           | 16  | 6.4  |
| genetic hierarchy       | 13q del (sole) | 34  | 13.7 |
|                         | normal         | 24  | 9.6  |
|                         | trisomy 12     | 13  | 5.2  |
|                         | 11q del        | 34  | 13.7 |
|                         | 17p del        | 9   | 3.6  |
|                         | other          | 1   | 0.4  |
|                         | n.a.           | 134 | 53.8 |

Serum samples of these patients were used for GRN quantification. IGHV: immunoglobulin heavy-chain variable region gene segments. n.a.: not available. del: deletion. Genetic hierarchy according to Döhner et al. [1]. Patients included in the study comprised clinical stages Binet B and C and required clinical intervention.

**Table S2.** Prognostic value of GRN serum levels in CLL patients.

|     | Univariate Analysis |                  |                  |                | Multivariate Analysis |                  |                  |                |
|-----|---------------------|------------------|------------------|----------------|-----------------------|------------------|------------------|----------------|
|     | HR                  | Lower<br>95 % CI | Upper<br>95 % CI | <i>p</i> Value | HR                    | Lower<br>95 % CI | Upper<br>95 % CI | <i>p</i> Value |
| PFS | 1.140               | 1.049            | 1.240            | 0.002          | 1.0803                | 0.9818           | 1.1887           | 0.113          |
| TAD | 1.149               | 1.027            | 1.286            | 0.016          | 1.0803                | 0.9506           | 1.2278           | 0.237          |
| OS  | 1.145               | 1.027            | 1.276            | 0.015          | 1.0687                | 0.9443           | 1.2095           | 0.292          |

Association of GRN levels with progression-free survival (PFS), tumor-associated deaths (TAD, competing risks analysis), and overall survival (OS) was analyzed by univariate and multivariate Cox proportional hazards regression models. GRN levels were log<sub>2</sub> transformed and entered as continuous variables. The multivariate analysis included the co-variables rituximab treatment, age, 11q deletion, 17p deletion, and IGHV mutational status. Due to data unavailability for these co-variables for n = 21 out of n = 249 patients, the multivariate analysis was performed after multiple imputation of missing values. HR: hazard ratio estimated from Cox proportional regression model. 95 % CI: 95 % confidence interval of the estimated HR. *p* value: Wald *p* value.

**Table S3.** CLL patient data.

| CLL Patient Number | IGHV Status | FISH                  | ZAP70 Status | CLL Cell Content | Refers to Figure: |
|--------------------|-------------|-----------------------|--------------|------------------|-------------------|
| 1                  | mutated     | 13q del (85 % bi-del) | n.a.         | 33.9 %           | 2                 |
| 2                  | mutated     | 13q del               | negative     | 75.9 %           | S1                |
| 3                  | mutated     | 13q del               | negative     | 97.7 %           | S1                |
| 4                  | unmutated   | 13q del               | n.a.         | 88.3 %           | S1                |
| 5                  | n.a.        | n.a.                  | n.a.         | 83.6 %           | 2                 |
| 6                  | n.a.        | n.a.                  | n.a.         | 97.2 %           | S1, 2             |
| 7                  | n.a.        | n.a.                  | n.a.         | 92.9 %           | 2                 |
| 8                  | n.a.        | n.a.                  | n.a.         | 78.1 %           | 2                 |
| 9                  | n.a.        | n.a.                  | n.a.         | 88.4 %           | 2                 |
| 10                 | unmutated   | 13q del               | n.a.         | 68.0 %           | S1                |
| 11                 | n.a.        | n.a.                  | n.a.         | 89.4 %           | 3                 |
| 12                 | n.a.        | n.a.                  | n.a.         | 95.9 %           | 2                 |
| 13                 | n.a.        | n.a.                  | n.a.         | 95 %             | 3                 |
| 14                 | mutated     | 13q del               | negative     | 82.5 %           | 3                 |
| 15                 | unmutated   | normal                | n.a.         | 96.4 %           | 3                 |
| 16                 | unmutated   | 13q del               | n.a.         | 94.6 %           | 3                 |
| 17                 | mutated     | 13q del               | n.a.         | 87.1 %           | 3                 |
| 18                 | n.a.        | n.a.                  | n.a.         | 89.4 %           | 3                 |
| 19                 | n.a.        | n.a.                  | n.a.         | 80.1 %           | 2, 3              |
| 20                 | mutated     | 13q del               | n.a.         | 82.3 %           | 2                 |
| 21                 | mutated     | normal                | negative     | 92.7 %           | 2                 |
| 22                 | n.a.        | n.a.                  | n.a.         | 85.9 %           | 2                 |
| 23                 | mutated     | 13q del               | negative     | 67 %             | 2                 |
| 24                 | mutated     | 13q del               | n.a.         | 79.4 %           | 2                 |
| 25                 | unmutated   | 13q del               | n.a.         | 93.6 %           | 2                 |
| 26                 | mutated     | 13q del               | n.a.         | 83.4 %           | 2                 |
| 27                 | n.a.        | n.a.                  | n.a.         | 56.7 %           | 2                 |
| 28                 | n.a.        | n.a.                  | n.a.         | 79.2 %           | 2                 |
| 29                 | n.a.        | n.a.                  | n.a.         | n.a.             | 2                 |
| 30                 | n.a.        | n.a.                  | n.a.         | n.a.             | 2                 |
| 31                 | mutated     | normal                | n.a.         | 98.2 %           | 2                 |
| 32                 | n.a.        | n.a.                  | n.a.         | 94.5 %           | 2                 |

Characteristics of CLL donors that provided blood samples that were used for in vitro experiments. IGHV: immunoglobulin heavy-chain variable region gene segments. FISH: fluorescence in situ hybridization. del: deletion. trans: translocation. bi-del: bi-deletion. n.a.: not available. CLL cell content: CD5<sup>+</sup> CD19<sup>+</sup> cells out of single cells in patient-derived peripheral blood mononuclear cells as determined by flow cytometry.

**Table S4.** Top upregulated genes in human mesenchymal stromal cells (MSCs) after CLL co-culture.

| <b>Illumina<br/>Probe ID</b> | <b>Gene<br/>Symbol</b> | <b>Gene<br/>ID</b> | <b>log<br/>FC</b> | <b>av.<br/>expr.</b> | <b>t</b> | <b>p value</b> | <b>adj. p<br/>value</b> | <b>B</b> |
|------------------------------|------------------------|--------------------|-------------------|----------------------|----------|----------------|-------------------------|----------|
| ILMN_2313672                 | IL1RL1                 | 9173               | 3.84              | 6.01                 | 9.00     | 1.56E-04       | 3.88E-02                | 1.68     |
| ILMN_1775501                 | IL1B                   | 3553               | 3.82              | 6.53                 | 7.46     | 4.17E-04       | 4.29E-02                | 0.74     |
| ILMN_2188862                 | GDF15                  | 9518               | 3.48              | 11.85                | 15.03    | 9.90E-06       | 3.57E-02                | 3.95     |
| ILMN_1726448                 | MMP1                   | 4312               | 3.41              | 6.07                 | 14.46    | 1.22E-05       | 3.57E-02                | 3.80     |
| ILMN_2352097                 | GPR56                  | 9289               | 3.36              | 6.84                 | 12.47    | 2.73E-05       | 3.57E-02                | 3.19     |
| ILMN_1676984                 | DDIT3                  | 1649               | 3.23              | 10.73                | 9.12     | 1.46E-04       | 3.88E-02                | 1.74     |
| ILMN_1661861                 | CSF2                   | 1437               | 3.19              | 6.02                 | 9.27     | 1.34E-04       | 3.88E-02                | 1.82     |
| ILMN_1729691                 | SLC16A6                | 9120               | 3.13              | 5.71                 | 12.77    | 2.41E-05       | 3.57E-02                | 3.29     |
| ILMN_1758895                 | CTSK                   | 1513               | 3.11              | 10.82                | 13.20    | 2.01E-05       | 3.57E-02                | 3.43     |
| ILMN_1734611                 | BDKRB1                 | 623                | 3.09              | 7.52                 | 10.64    | 6.44E-05       | 3.57E-02                | 2.48     |
| ILMN_3235379                 | LOC100134265           | 100134265          | 3.05              | 8.16                 | 10.27    | 7.77E-05       | 3.57E-02                | 2.31     |
| ILMN_1800225                 | PPARG                  | 5468               | 3.05              | 7.51                 | 12.84    | 2.33E-05       | 3.57E-02                | 3.31     |
| ILMN_1677092                 | GEM                    | 2669               | 3.03              | 7.94                 | 7.21     | 4.95E-04       | 4.32E-02                | 0.57     |
| ILMN_1681983                 | RSPO3                  | 84870              | 3.03              | 6.57                 | 6.88     | 6.29E-04       | 4.55E-02                | 0.33     |
| ILMN_2384122                 | GPR56                  | 9289               | 3.00              | 6.44                 | 9.44     | 1.21E-04       | 3.88E-02                | 1.91     |
| ILMN_1780057                 | RENBP                  | 5973               | 2.94              | 5.86                 | 12.26    | 3.00E-05       | 3.57E-02                | 3.11     |
| ILMN_3298423                 | TOX2                   | 84969              | 2.88              | 7.62                 | 12.46    | 2.74E-05       | 3.57E-02                | 3.19     |
| ILMN_1798210                 | E2F7                   | 144455             | 2.87              | 7.64                 | 10.87    | 5.73E-05       | 3.57E-02                | 2.58     |
| ILMN_2400326                 | DYRK3                  | 8444               | 2.87              | 8.97                 | 7.49     | 4.07E-04       | 4.28E-02                | 0.76     |
| ILMN_1773262                 | ESM1                   | 11082              | 2.86              | 8.64                 | 9.52     | 1.16E-04       | 3.88E-02                | 1.95     |
| ILMN_1715401                 | MT1G                   | 4495               | 2.80              | 9.87                 | 11.75    | 3.77E-05       | 3.57E-02                | 2.93     |
| ILMN_2364384                 | PPARG                  | 5468               | 2.74              | 6.16                 | 11.10    | 5.12E-05       | 3.57E-02                | 2.67     |
| ILMN_1837428                 | n.a.                   | n.a.               | 2.73              | 8.12                 | 11.31    | 4.63E-05       | 3.57E-02                | 2.76     |
| ILMN_1687213                 | C8orf13                | 83648              | 2.71              | 6.57                 | 8.07     | 2.78E-04       | 4.09E-02                | 1.13     |
| ILMN_1748840                 | CALB2                  | 794                | 2.71              | 10.12                | 10.10    | 8.48E-05       | 3.69E-02                | 2.23     |
| ILMN_1671353                 | IL12A                  | 3592               | 2.70              | 7.89                 | 11.71    | 3.84E-05       | 3.57E-02                | 2.91     |
| ILMN_1733579                 | EVI2A                  | 2123               | 2.68              | 8.11                 | 11.53    | 4.18E-05       | 3.57E-02                | 2.84     |
| ILMN_3237376                 | GRAMD1B                | 57476              | 2.65              | 5.93                 | 10.63    | 6.47E-05       | 3.57E-02                | 2.47     |
| ILMN_1730454                 | FOLR3                  | 2352               | 2.65              | 7.39                 | 8.71     | 1.86E-04       | 3.97E-02                | 1.52     |
| ILMN_2212878                 | ESM1                   | 11082              | 2.65              | 9.17                 | 8.98     | 1.58E-04       | 3.88E-02                | 1.66     |
| ILMN_3248511                 | FAM167A                | 83648              | 2.61              | 6.89                 | 7.78     | 3.34E-04       | 4.11E-02                | 0.95     |
| ILMN_1744217                 | HTR7                   | 3363               | 2.61              | 6.16                 | 10.46    | 7.05E-05       | 3.57E-02                | 2.40     |

| Illumina Probe ID | Gene Symbol  | Gene ID   | log FC | av. expr. | t     | p value  | adj. p value | B    |
|-------------------|--------------|-----------|--------|-----------|-------|----------|--------------|------|
| ILMN_2311537      | HMGA1        | 3159      | 2.59   | 10.55     | 10.50 | 6.89E-05 | 3.57E-02     | 2.42 |
| ILMN_1808508      | KITLG        | 4254      | 2.57   | 7.24      | 9.38  | 1.25E-04 | 3.88E-02     | 1.88 |
| ILMN_3258346      | LOC100130009 | 100130009 | 2.56   | 6.12      | 9.90  | 9.45E-05 | 3.72E-02     | 2.14 |
| ILMN_2285708      | C6orf48      | 50854     | 2.54   | 6.25      | 6.96  | 5.92E-04 | 4.53E-02     | 0.39 |
| ILMN_1687978      | PHLDA1       | 22822     | 2.50   | 11.62     | 8.76  | 1.81E-04 | 3.97E-02     | 1.54 |
| ILMN_1699421      | ANXA10       | 11199     | 2.49   | 6.69      | 9.12  | 1.46E-04 | 3.88E-02     | 1.74 |
| ILMN_2341595      | KITLG        | 4254      | 2.47   | 7.88      | 9.95  | 9.19E-05 | 3.70E-02     | 2.16 |
| ILMN_1697409      | TNFRSF14     | 8764      | 2.46   | 9.28      | 10.61 | 6.53E-05 | 3.57E-02     | 2.46 |
| ILMN_1669046      | FOXQ1        | 94234     | 2.44   | 6.51      | 10.09 | 8.55E-05 | 3.69E-02     | 2.23 |
| ILMN_1727592      | FRMD5        | 84978     | 2.43   | 6.14      | 7.28  | 4.71E-04 | 4.32E-02     | 0.62 |
| ILMN_1783840      | FLJ42986     | 389012    | 2.43   | 7.12      | 6.71  | 7.14E-04 | 4.69E-02     | 0.20 |
| ILMN_1761281      | LOC441019    | 441019    | 2.43   | 9.33      | 10.33 | 7.55E-05 | 3.57E-02     | 2.34 |
| ILMN_3289247      | LOC400750    | 400750    | 2.42   | 7.54      | 7.46  | 4.16E-04 | 4.29E-02     | 0.74 |
| ILMN_1712759      | SBSN         | 374897    | 2.41   | 5.88      | 9.26  | 1.35E-04 | 3.88E-02     | 1.81 |
| ILMN_1800091      | RARRES1      | 5918      | 2.40   | 8.10      | 10.35 | 7.47E-05 | 3.57E-02     | 2.35 |
| ILMN_1656593      | AK5          | 26289     | 2.39   | 6.90      | 7.30  | 4.64E-04 | 4.31E-02     | 0.63 |
| ILMN_2344662      | HMGA2        | 8091      | 2.36   | 5.83      | 7.31  | 4.61E-04 | 4.31E-02     | 0.64 |
| ILMN_1775268      | HECW2        | 57520     | 2.34   | 8.28      | 9.38  | 1.26E-04 | 3.88E-02     | 1.88 |

Differential expression between paired samples (MSC in CLL co-culture vs. the respective untreated MSC) was analyzed using Illumina probes. The table shows Illumina probe ID, gene symbol, Entrez gene ID (Gene ID), the log<sub>2</sub> fold change (logFC), the average log<sub>2</sub> expression (av. expr.), the moderated test statistic (t), raw *p* value (*p* value), Benjamini-Hochberg adjusted *p* value (adj. *p* value) and the log-odds that the gene is differentially expressed (B). n.a.: not available. Adj. *p* value < 0.05 (454 probes); the top 50 upregulated probes, ordered by logFC, out of 454 significantly deregulated probes are listed.

**Table S5.** List of flow cytometry antibodies.

| <b>Antigen</b>   | <b>Fluorochrome</b> | <b>Clone</b>  | <b>Distributor</b>                                     |
|------------------|---------------------|---------------|--------------------------------------------------------|
| anti-human CD5   | FITC                | L17F12        | BD biosciences, Heidelberg, Germany                    |
| anti-human CD11b | PE                  | ICRF44        | BD biosciences, Heidelberg, Germany                    |
| anti-human CD19  | PE                  | HIB19         | BD biosciences, Heidelberg, Germany                    |
| anti-human CD19  | APC                 | HIB19         | BD biosciences, Heidelberg, Germany                    |
| anti-human CD20  | APC                 | 2H7           | BD biosciences, Heidelberg, Germany                    |
| anti-human CD44  | PE                  | G44-26        | BD biosciences, Heidelberg, Germany                    |
| anti-human CD45  | PE                  | HI30          | BD biosciences, Heidelberg, Germany                    |
| anti-human CD73  | APC                 | AD2           | BD biosciences, Heidelberg, Germany                    |
| anti-human CD86  | PE                  | n.a.          | BD biosciences, Heidelberg, Germany                    |
| anti-human CD90  | FITC                | 5E10          | BD biosciences, Heidelberg, Germany                    |
| anti-human CD105 | PerCP-Cy5.5         | 266           | BD biosciences, Heidelberg, Germany                    |
| anti-human HLADR | PE                  | L243          | BD biosciences, Heidelberg, Germany                    |
| anti-mouse CD3   | APC                 | 145-2C11      | BioLegend, San Diego, CA, USA                          |
| anti-mouse CD3   | FITC                | 145-2C11      | BioLegend, San Diego, CA, USA                          |
| anti-mouse CD4   | AF700               | OKT4 or RM4-5 | BioLegend, San Diego, CA, USA                          |
| anti-mouse CD4   | PerCP-Cy5.5         | RM4-4         | BioLegend, San Diego, CA, USA                          |
| anti-mouse CD5   | PE                  | S3-7.3        | BioLegend, San Diego, CA, USA                          |
| anti-mouse CD5   | APC                 | 53-7.3        | BioLegend, San Diego, CA, USA                          |
| anti-mouse CD8a  | APC Cy7             | 53-6.7        | BioLegend, San Diego, CA, USA                          |
| anti-mouse CD11b | PerCP-Cy5.5         | M1/70         | eBioscience/Thermo Fisher Scientific, Waltham, MA, USA |
| anti-mouse CD19  | PE                  | eBio1D3       | eBioscience/Thermo Fisher Scientific, Waltham, MA, USA |
| anti-mouse CD19  | PE Cy7              | eBio1D3       | eBioscience/Thermo Fisher Scientific, Waltham, MA, USA |
| anti-mouse CD19  | FITC                | eBio1D3       | eBioscience/Thermo Fisher Scientific, Waltham, MA, USA |
| anti-mouse CD45  | AF700               | 30-F11        | BioLegend, San Diego, CA, USA                          |
| anti-mouse CD45  | PE-Cy7              | 104           | BioLegend, San Diego, CA, USA                          |
| anti-mouse CD45  | PerCP Cy5.5         | 30-F11        | BioLegend, San Diego, CA, USA                          |
| anti-mouse CXCR1 | PE-Dazzle           | SA011F11      | BioLegend, San Diego, CA, USA                          |



**Table S6.** List of flow cytometry antibody panels.

| Cells Stained                                       | Description                                                                                                  | Antibody Panel (Dilution)                                                                                                                                                                                                                                         |
|-----------------------------------------------------|--------------------------------------------------------------------------------------------------------------|-------------------------------------------------------------------------------------------------------------------------------------------------------------------------------------------------------------------------------------------------------------------|
| human PBMCs from CLL patient-derived blood          | determine CLL cell content                                                                                   | CD5 FITC (1:10), CD19 APC (1:10)                                                                                                                                                                                                                                  |
|                                                     | confirm CLL cell purity after CD19 MACS                                                                      | CD5 FITC (1:10), CD20 APC (1:10)                                                                                                                                                                                                                                  |
| human MSCs from healthy donor bone marrow aspirates | analyze the immunophenotype and exclude contamination with hematopoietic cells                               | panel 1: CD73 APC (1:20), CD90 FITC (1:20), CD105 PerCP Cy5.5 (1:20), CD44 PE (1:10)<br>plus panel 2: CD73 APC (1:20), CD90 FITC (1:20), CD105 PerCP Cy5.5 (1:20), CD45 PE (1:10), CD11b PE (1:10), CD19 PE (1:20), HLADR PE (1:10)                               |
| human CLL cells                                     | quantify CD86 surface levels under different conditions                                                      | CD86 PE (1:20)                                                                                                                                                                                                                                                    |
| murine blood                                        | determine leukemic cell load after E $\mu$ - <i>TCL1</i> adoptive transfer and in controls                   | panel 1 (refers to Figure S2): CD5 PE (1:100), CD19 FITC (1:200), CD45 PerCP (1:200)                                                                                                                                                                              |
|                                                     |                                                                                                              | panel 2 (refers to Figure 5a): CD5 APC (1:200), CD19 FITC (1:100), CD45 AF700 (1:200)                                                                                                                                                                             |
| murine splenic single cell suspensions              | adoptively transferred and in controls                                                                       | panel 3 (refers to Figure 5c): CD5 APC (1:200), CD19 PE Cy7 (1:200), CD45 PerCP Cy5.5 (1:200)                                                                                                                                                                     |
|                                                     |                                                                                                              | panel 1 (refers to Figure S2): CD5 PE (1:100), CD19 FITC (1:200), CD45 PerCP (1:200)<br>panel 2 (refers to Figure 5d): Fixable viability stain 700 (1:1000, (BD biosciences, Heidelberg, Germany), CD5 APC (1:200), CD19 PE Cy7 (1:200), CD45 PerCP Cy5.5 (1:200) |
| murine peritoneal cavity cells                      |                                                                                                              | CD5 PE (1:100), CD19 FITC (1:200), CD45 PerCP (1:200)                                                                                                                                                                                                             |
| murine bone marrow cells                            | confirm successful T cell depletion in cells used to generate bone marrow chimeric mice                      | CD45 AF700 (1:200), CD3 APC (1:200), CD4 PerCP Cy5.5 (1:200), CD8 APC Cy7 (1:200),                                                                                                                                                                                |
| murine blood                                        | confirm successful bone marrow reconstitution by analysis of leukocytes in peripheral blood in chimeric mice | CD3 FITC (1:200), CD19 PE (1:200), CD4 AF700 (1:200), CD8 APC-Cy7 (1:200), CD11b PerCP-Cy5.5 (1:200), Cx3cr1 PE-Dazzle (1:200), CD45 PE-Cy7 (1:200)                                                                                                               |

**Table S7.** List of qPCR primers.

| <b>Primer Name</b>    | <b>Sequence 5' to 3'</b>  |
|-----------------------|---------------------------|
| 71 ACTG1 human fwd    | CCGAGCCGTGTTTCCTTCC       |
| 71 ACTG1 human rev    | GCCATGCTCAATGGGGTACT      |
| 6347 CCL2 human fwd   | AGTCTCTGCCGCCCTTCT        |
| 6347 CCL2 human rev   | GTGACTGGGGCATTGATTG       |
| 1513 CTSK human fwd   | GACAGGGGTACTTTGAGTCCA     |
| 1513 CTSK human rev   | GACAGGGGTACTTTGAGTCCA     |
| 2919 CXCL1 human fwd  | TCTTGAGTGTGGCTATGACTICG   |
| 2919 CXCL1 human rev  | GTGGCCACTGAACTGCGCT       |
| 3576 CXCL8 human fwd  | TCTCTTGGCAGCCTTCCTGA      |
| 3576 CXCL8 human rev  | GTGGAAAGGTTTGAGTATGTCITTA |
| 2512 FTL human fwd    | CAGCCTGGTCAATTTGTACCT     |
| 2512 FTL human rev    | GCCAATTCGCGGAAGAAGTG      |
| 3553 IL1B human fwd   | CTGTCCTGCGTGTGAAAGA       |
| 3553 IL1B human rev   | TTGGGTAATTTTTGGGATCTACA   |
| 9173 IL1RL1 human fwd | GAAAACCTAGTTACACCGTGGAT   |
| 9173 IL1RL1 human rev | GCAAACACACGATTTCTTTCCTG   |
| 3569 IL6 human fwd    | TCCTGATCCAGTTCCTGCAG      |
| 3569 IL6 human rev    | GCTGCGCAGAATGAGATGAGT     |
| 4312 MMP1 human fwd   | GGGAGATCATCGGGACAACCTC    |
| 4312 MMP1 human rev   | GGGCCTGGTTGAAAAGCAT       |
| 4314 MMP3 human fwd   | AGTCTTCCAATCCTACTGTTGCT   |
| 4314 MMP3 human rev   | TCCCCGTCACCTCCAATCC       |
| 6235 RPS29 human fwd  | CGCTCTGTCTGTCTGTTC        |
| 6235 RPS29 human rev  | CCTTCGCGTACTGACGGAAA      |
| 6696 SPP1 human fwd   | GCCGAGGTGATAGTGTGGTT      |
| 6696 SPP1 human rev   | TGAGGTGATGCCTCGTCTG       |
| 7431 VIM human fwd    | ACACCCTGCAATCTTTCAGACA    |
| 7431 VIM human rev    | GATCCACTTTGCGTTCAAGGT     |

Primers are named with the official gene symbol, gene ID, species, and fwd (forward) or rev (reverse).

**Table S8.** List of antibodies used for immunofluorescent stainings of human CLL lymph nodes.

| <b>Primary Antibody</b>                         | <b>Distributor</b>                                              |
|-------------------------------------------------|-----------------------------------------------------------------|
| anti-alpha smooth muscle actin antibody, rabbit | Abcam, Cambridge, United Kingdom (#ab5694)                      |
| anti-CD68 antibody, mouse                       | Abcam, Cambridge, United Kingdom (#ab955)                       |
| anti-human progranulin antibody, goat           | R&D Systems, Minneapolis, MN, USA (#AF2420)                     |
| <b>Secondary Antibody</b>                       | <b>Distributor</b>                                              |
| Alexa fluor 488 donkey anti-goat antibody       | Invitrogen/Thermo Fisher Scientific, Waltham, MA, USA (#A11055) |
| Alexa fluor 488 donkey anti-rabbit antibody     | Invitrogen/Thermo Fisher Scientific, Waltham, MA, USA (#A21206) |
| Cy3 rabbit anti-mouse antibody                  | Jackson ImmunoResearch Laboratories, West Grove, PA, USA        |
| Cy5 donkey anti-goat antibody                   | Jackson ImmunoResearch Laboratories, West Grove, PA, USA        |

The following antibody combinations and dilutions were used: (i) anti-human progranulin antibody (goat, 1:100) – Alexa fluor 488 anti-goat antibody (donkey, 1:300); anti-human CD68 antibody (mouse, 1:200) – Cy3 anti-mouse antibody (rabbit, 1:300) (ii) anti-human progranulin antibody (goat, 1:100) – Cy5 anti-goat antibody (donkey, 1:300); anti-human alpha smooth muscle actin antibody (rabbit, 1:100) – Alexa fluor 488 anti-rabbit antibody (donkey, 1:300).

## Supplementary Methods

### 1. Supplementary cell culture experiments (Figure S1)

BJ fibroblasts were purchased from ATCC, Manassas, VA, USA. C57BL/6 fibroblasts were kindly provided by Dr. Gloria Lutzny and Dr. Ingo Ringshausen, formerly Technical University, Munich, Germany and generated as described previously [2].

BJ fibroblasts or C57BL/6 fibroblasts were either cultured alone or co-cultured with  $5 \times 10^5$  CLL PBMCs in 250  $\mu$ L DMEM supplemented with 4.5 g/L glucose, 4 mM L-glutamine, 10 % fetal calf serum, and 1 % Penicillin / Streptomycin (10,000 U/mL) in a 48-well plate format.

### 2. Supplementary mouse studies (Figure S2)

Total splenocytes of a leukemic transgenic E $\mu$ -*TCL1* mouse (leukemic cell load of 91.1 % CD5<sup>+</sup> CD19<sup>+</sup> cells out of viable splenocytes) were suspended in PBS.  $2 \times 10^7$  of those splenocytes/mouse were transferred to *Gm<sup>+</sup>* mice and *Gm<sup>-</sup>* mice by i.p. injection. All recipient mice were 7-8 weeks old males and littermates.

Information on mouse lines, authorization of studies, and isolation protocols of blood and spleen are described in the main part of the manuscript. Additional isolation of peritoneal cavity cells was performed as previously described [3].

## References

1. Döhner, H.; Stilgenbauer, S.; Benner, A.; Leupolt, E.; Krober, A.; Bullinger, L.; Dohner, K.; Bentz, M.; Lichter, P. Genomic aberrations and survival in chronic lymphocytic leukemia. *The New England journal of medicine* **2000**, *343*, 1910-1916, doi:10.1056/nejm200012283432602.
2. Lutzny, G.; Kocher, T.; Schmidt-Supprian, M.; Rudelius, M.; Klein-Hitpass, L.; Finch, A.J.; Durig, J.; Wagner, M.; Haferlach, C.; Kohlmann, A., et al. Protein kinase c-beta-dependent activation of NF-kappaB in stromal cells is indispensable for the survival of chronic lymphocytic leukemia B cells in vivo. *Cancer cell* **2013**, *23*, 77-92, doi:10.1016/j.ccr.2012.12.003.
3. Ray, A.; Dittel, B.N. Isolation of mouse peritoneal cavity cells. *Journal of visualized experiments : JoVE* **2010**, 10.3791/1488, doi:10.3791/1488.
